# Supplementary material for: Study on the allosteric activation mechanism of SHP2 via elastic network models and neural relational inference molecular dynamics simulation
Source: Royal Society of Chemistry journal article supplement (doi:10.1039/d3cp02795c), 2023-01-01
Supplement: d3cp02795c1.pdf [file d3cp02795c1.pdf]

Supporting material:

Study on allosteric activation mechanism of SHP2 via elastic network models and neural relational inference  
molecular dynamics simulation

Ling Liu<sup>a,b,†</sup>, Yan Cheng<sup>c,†</sup>, Zhigang Zhang<sup>b,†</sup>, Jing Li<sup>b</sup>, Yichao Geng<sup>a</sup>, Qingsong Li<sup>a</sup>, Daxian Luo<sup>a</sup>, Li Liang<sup>b</sup>, Wei Liu<sup>b</sup>, Jianping Hu<sup>b</sup>, Weiwei Ouyang<sup>a\*</sup>

<sup>a</sup> Department of Thoracic Oncology, Affiliated Cancer Hospital, Guizhou Medical University, Guiyang, China

<sup>b</sup> Key Laboratory of Medicinal and Edible Plants Resources Development of Sichuan Education Department, School of Pharmacy, Chengdu University, Chengdu, China

<sup>c</sup> Breast Disease Center, Cancer Center, West China Hospital, Sichuan University, Chengdu, Sichuan 610000, China

\* Corresponding author. E-mail address: ouyangww73@163.com (W. Ouyang).

† These authors contributed equally to this work

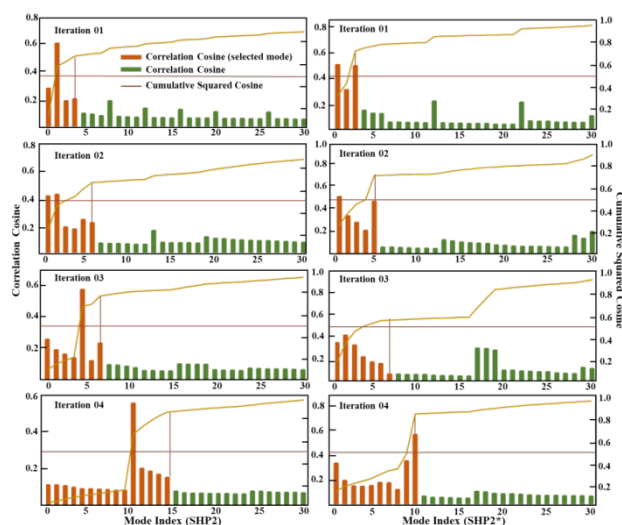

**Figure S1.** Correlation cosine between instantaneous distance vector and eigenmodes. The left and right columns indicate conformational iterations from inactive and active to intermediate states, respectively. Principal components whose sum of cosine squares is greater than 0.5 are shown in orange, almost exhibiting complete functional slow motion.

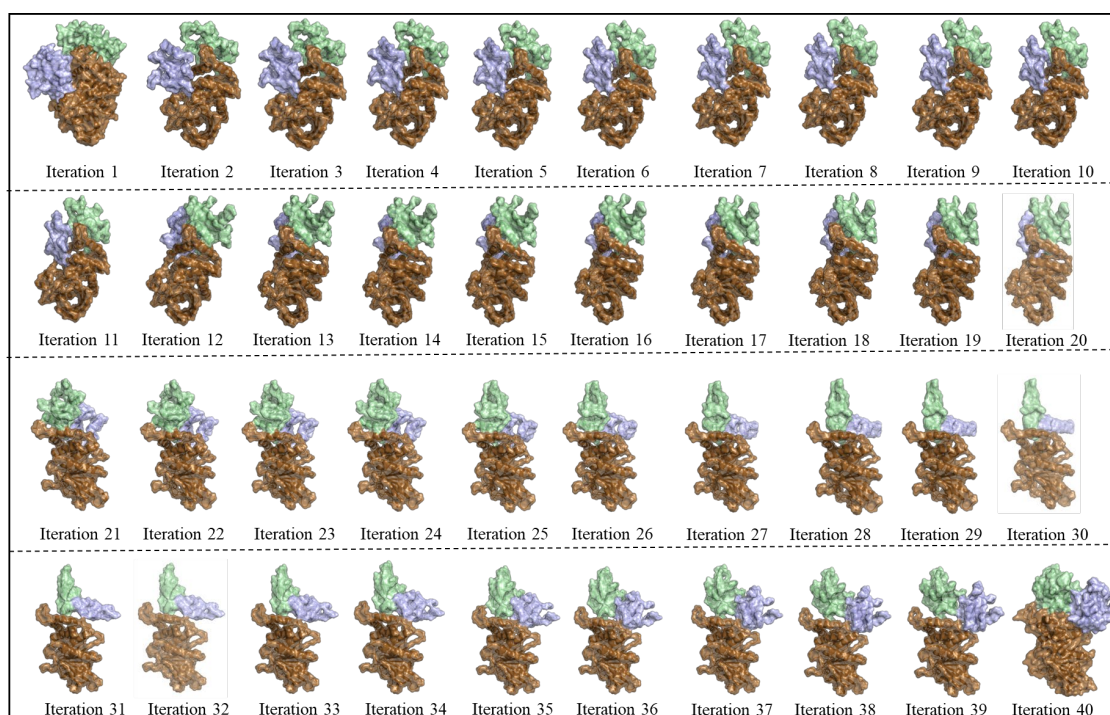

Figure S2. 40 intermediate conformations in the deformation of SHP2 from the closed to the open state.

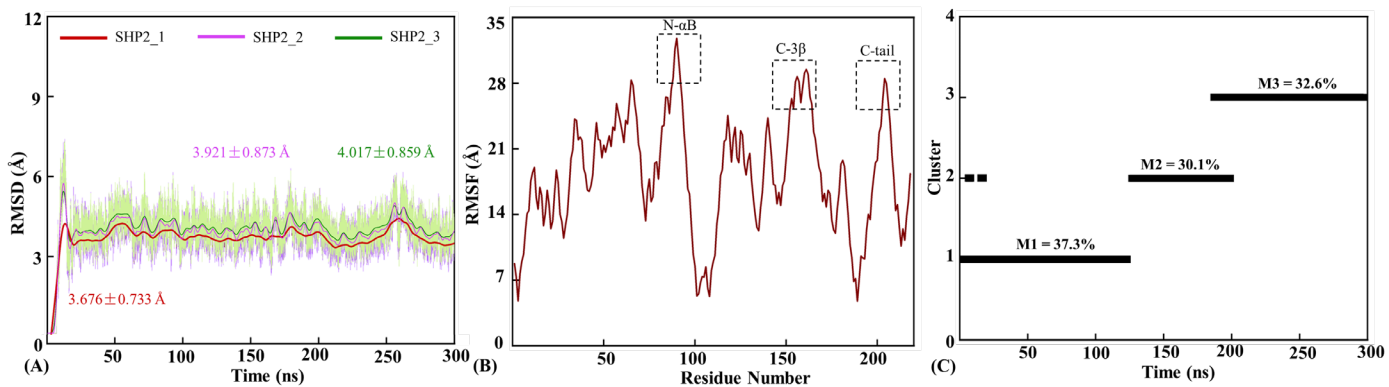

**Figure S3.** Three conventional molecular dynamics simulation of the SHP2 system. RMSD values of all the  $C\alpha$  atoms; (B) RMSF distribution at residue level. Three regions N- $\alpha$ B, C-3 $\beta$  and C-tail show high flexibility.
